# Supplementary material for: Snapshot into the Type-2-Diabetes-Associated Microbiome of a Romanian Cohort
Source: MDPI journal article supplement (doi:10.3390/ijms232315023), 2022-11-30
Supplement: s1 [file s1]

## Beta diversity

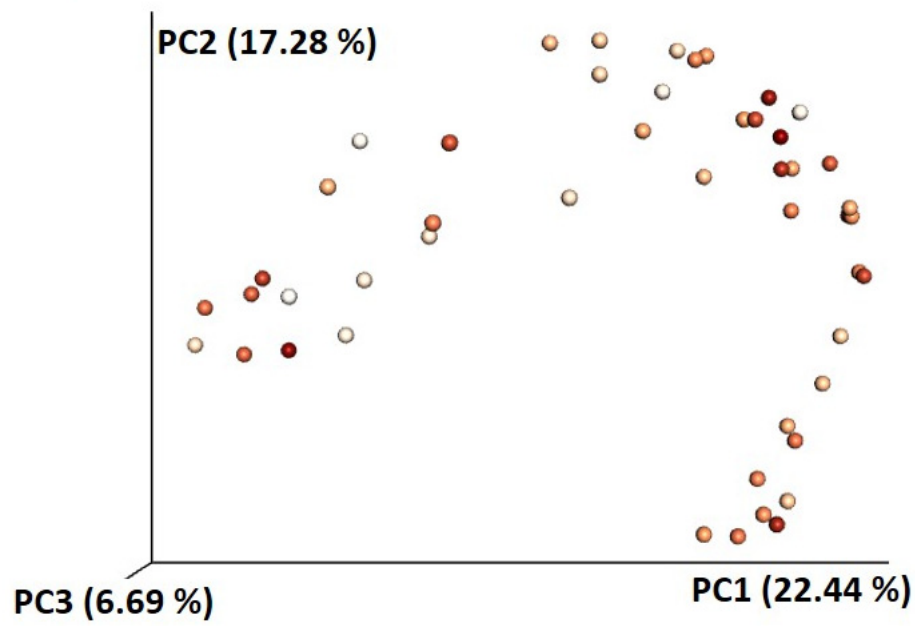

**Supplementary Figure S1.** Beta diversity analysis at species level: principal coordinate analysis (PCoA) based on Bray-Curtis dissimilarity (species level)
